# Supplementary material
Source: Springer Nature journal article supplement (https://www.springermedizin.de/resource/supplementary/12933_2012_506_MOESM1_ESM.pdf/9538708)

## Wild type

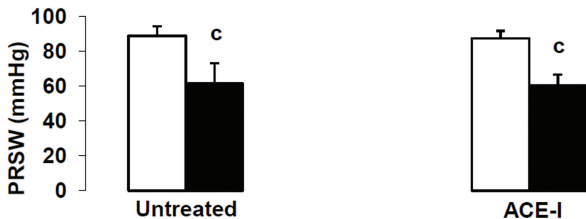

## ob/ob

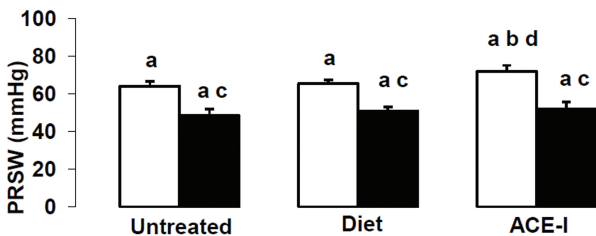

## DKO

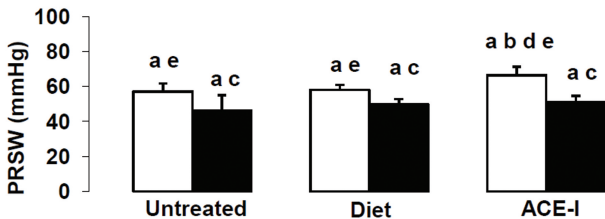

Supplement: MOESM1 [file 9538708]
